# Supplementary material for: MRI and Additive Manufacturing of Nasal Alar Constructs for Patient-specific Reconstruction
Source: PubMed Central journal article supplement (PMC5577227; doi:10.1038/s41598-017-10602-9), 2017-08-30
Supplement: 41598_2017_10602_MOESM1_ESM.pdf [file 41598_2017_10602_MOESM1_ESM.pdf]

**MRI and Additive Manufacturing of Nasal Alar Constructs for  
Patient-specific Reconstruction**

Dafydd O. Visscher, Maureen van Eijnatten, Niels P.T.J. Liberton, Jan Wolff, Mark  
B.M. Hofman, Marco N. Helder, J. Peter Don Griot, Paul P.M van Zuijlen

**Supplementary Table I. Raw data on cartilage thickness (mm), surface area (mm<sup>2</sup>), and volume (mm<sup>3</sup>) on 3.0-T MRI in a cadaver and volunteer by 3 observers.**

| Cartilage Thickness (mm)                       |               |          |          |                            |                 |          |          |
|------------------------------------------------|---------------|----------|----------|----------------------------|-----------------|----------|----------|
| Observer 1                                     | Cadaver (MRI) |          |          | Gold standard ( $\mu$ -CT) | Volunteer (MRI) |          |          |
|                                                | Repeat 1      | Repeat 2 | Repeat 3 |                            | Repeat 1        | Repeat 2 | Repeat 3 |
| Measure 1                                      | 1.9           | 1.5      | 2.1      | 1.9                        | 2.1             | 2.2      | 2.2      |
| Measure 2                                      | 2.2           | 2.6      | 2.5      | 2.5                        | 2.2             | 2.2      | 2.1      |
| Measure 3                                      | 2.0           | 2.2      | 2.4      | 2.1                        | 3.0             | 3.0      | 3.1      |
| Mean                                           | 2.0           | 2.1      | 2.3      | 2.2                        | 2.4             | 2.5      | 2.5      |
| SD                                             | 0.2           | 0.6      | 0.2      | 0.3                        | 0.5             | 0.5      | 0.5      |
| <b>Observer 2</b>                              |               |          |          |                            |                 |          |          |
| Measure 1                                      | 2.0           | 1.5      | 2.0      | 1.9                        | 1.8             | 2.3      | 2.4      |
| Measure 2                                      | 1.8           | 2.2      | 2.8      | 2.5                        | 2.3             | 2.6      | 1.7      |
| Measure 3                                      | 2.1           | 2.3      | 2.4      | 2.1                        | 2.7             | 2.4      | 2.5      |
| Mean                                           | 2.0           | 2.0      | 2.4      | 2.2                        | 2.3             | 2.5      | 2.2      |
| SD                                             | 0.2           | 0.4      | 0.4      | 0.3                        | 0.4             | 0.2      | 0.4      |
| <b>Observer 3</b>                              |               |          |          |                            |                 |          |          |
| Measure 1                                      | 2.0           | 1.8      | 1.9      | 1.9                        | 1.8             | 2.0      | 2.3      |
| Measure 2                                      | 1.8           | 2.1      | 2.1      | 2.5                        | 1.9             | 2.2      | 1.3      |
| Measure 3                                      | 2.1           | 2.4      | 2.6      | 2.1                        | 2.4             | 3.0      | 2.3      |
| Mean                                           | 2.0           | 2.1      | 2.2      | 2.2                        | 2.0             | 2.4      | 2.0      |
| SD                                             | 0.1           | 0.3      | 0.4      | 0.3                        | 0.3             | 0.5      | 0.6      |
| <b>Cartilage Surface Area (mm<sup>2</sup>)</b> |               |          |          |                            |                 |          |          |
| Observer 1                                     | 791           | 841      | 864      | 938                        | 998             | 1016     | 1050     |
| Observer 2                                     | 739           | 754      | 849      | 938                        | 807             | 871      | 905      |
| Observer 3                                     | 772           | 882      | 849      | 938                        | 1019            | 972      | 925      |
| <b>Cartilage Volume (mm<sup>3</sup>)</b>       |               |          |          |                            |                 |          |          |
| Observer 1                                     | 551           | 555      | 664      | 420                        | 700             | 669      | 792      |
| Observer 2                                     | 482           | 547      | 620      | 420                        | 427             | 626      | 657      |
| Observer 3                                     | 500           | 621      | 586      | 420                        | 575             | 628      | 594      |

Raw data, mean, and standard deviation (SD) are shown for manual segmentations by all 3 observers. The gold standard ( $\mu$ -CT) is also shown in the middle column. Measures 1-3, as shown in the first column for cartilage thickness (mm), indicate measurements taken at 3 points on the alar cartilage.  $\mu$ -CT, micro-computed tomography; MRI, magnetic resonance imaging; SD, standard deviation
